# Supplementary material for: Use of SNP chips to detect rare pathogenic variants: retrospective, population based diagnostic evaluation
Source: PubMed Central journal article supplement (PMC7879796; doi:10.1136/bmj.n214), 2021-02-15

**Supplementary Figure A** PPV of UK Biobank BiLEVE® SNP-chip for detecting variants at different population frequencies.

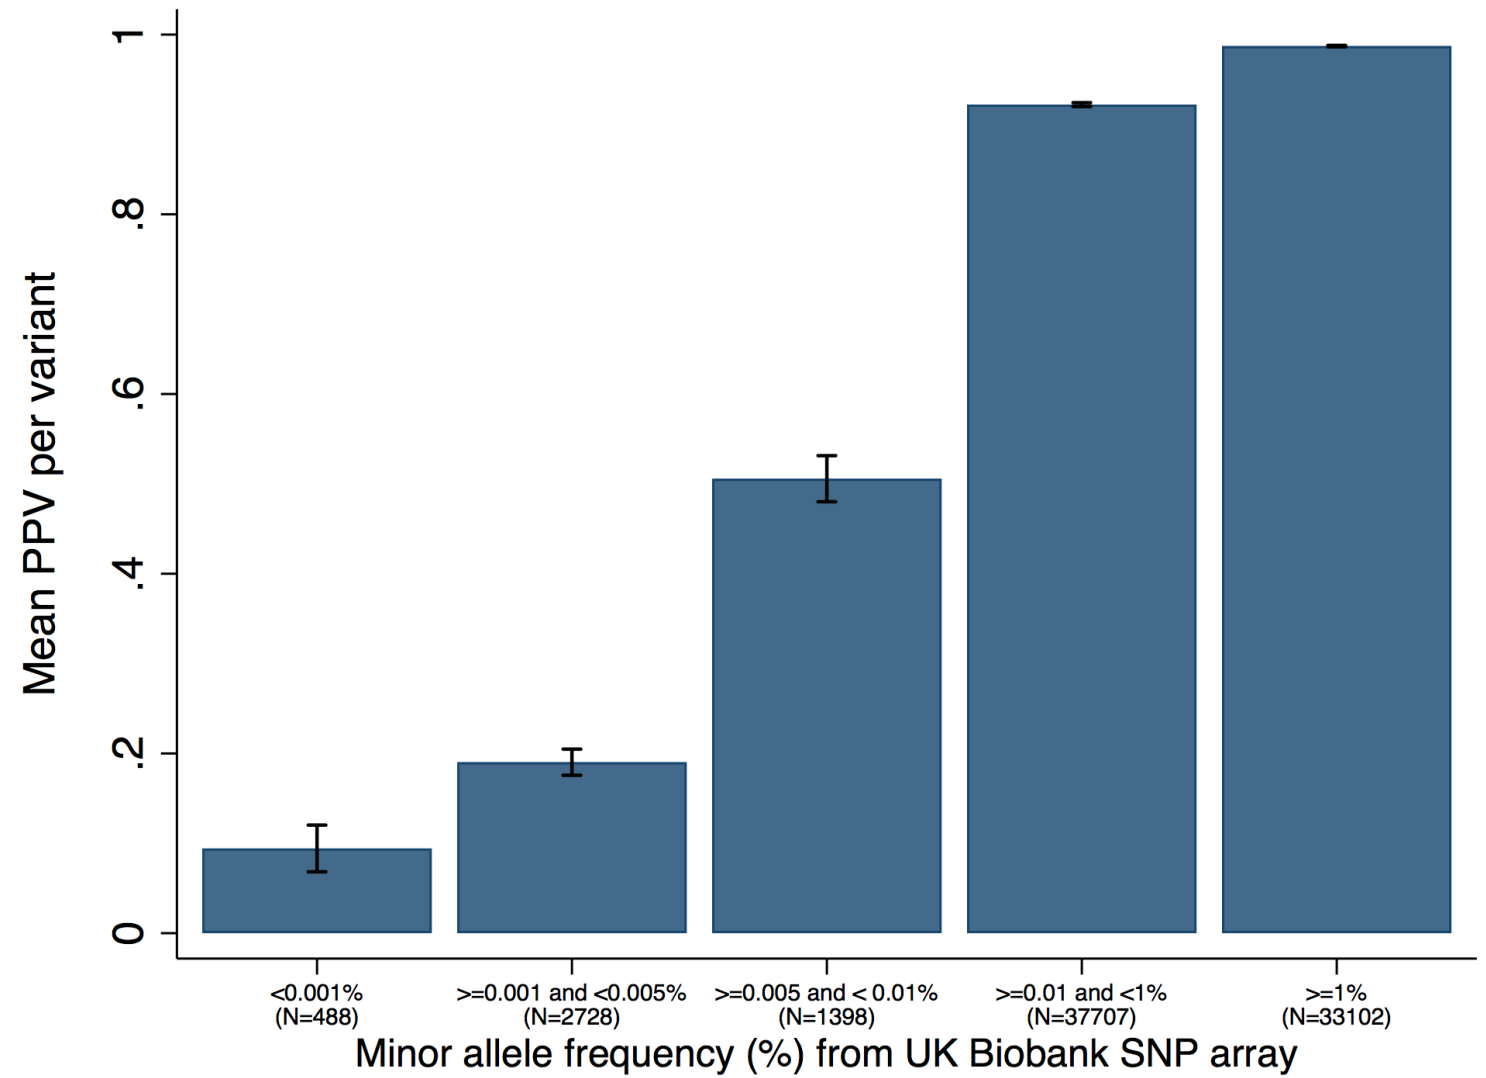

**Supplementary Figure B** PPV of SNP chips available through the Personal Genome Project for detecting variants at different population frequencies.

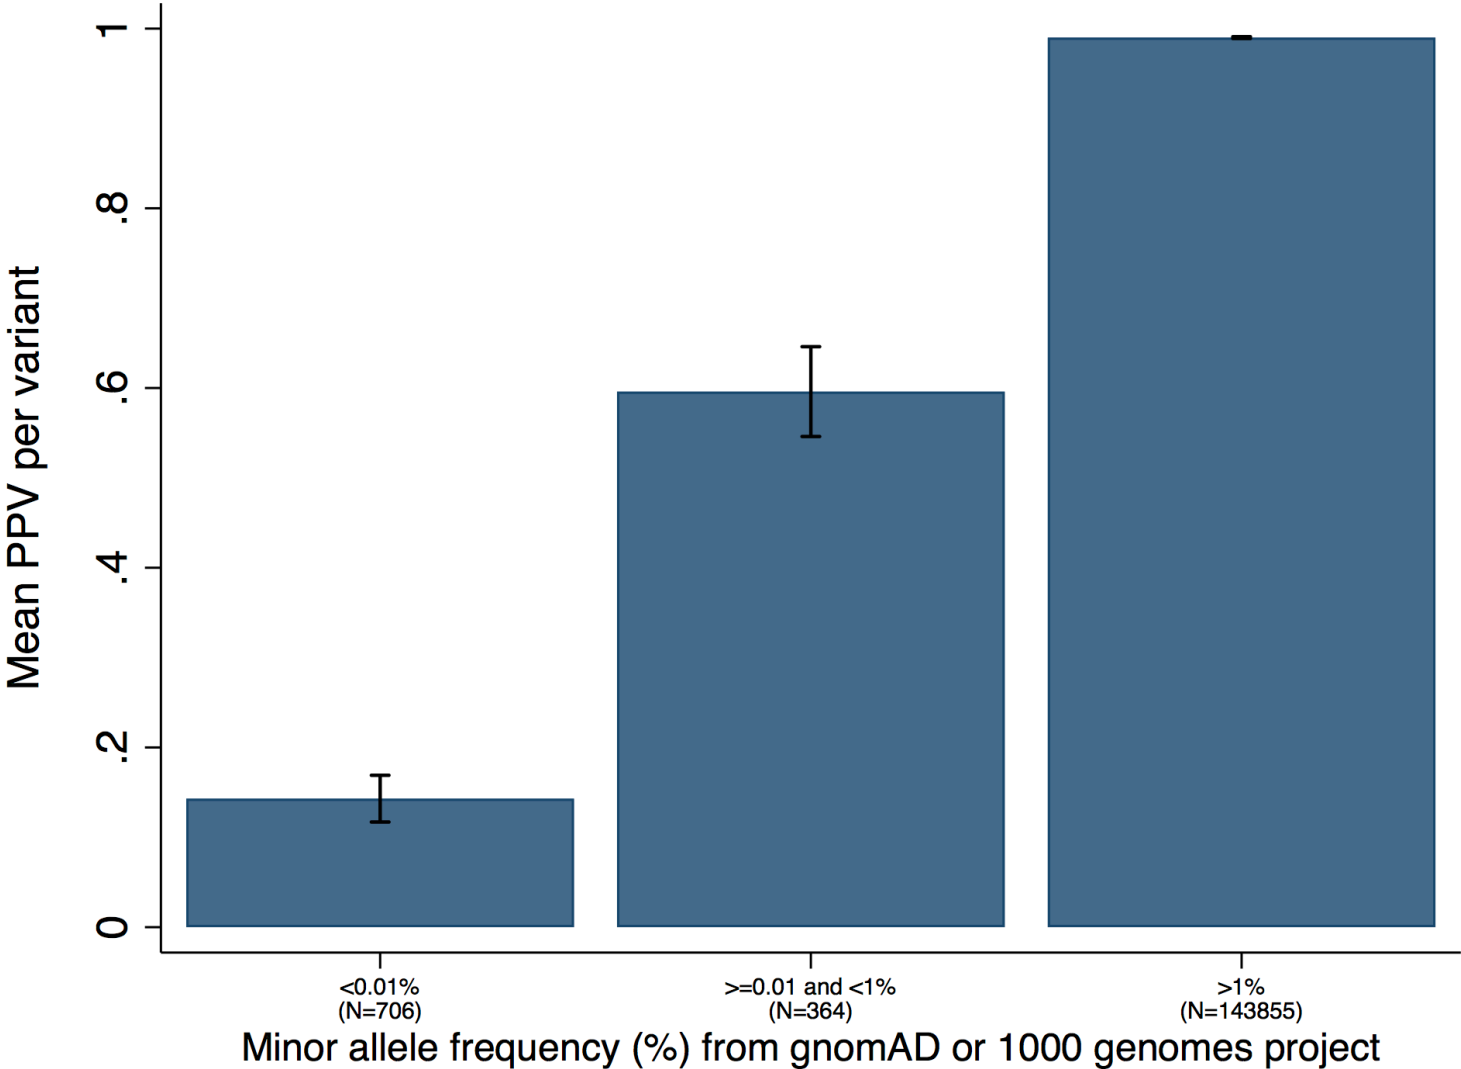

**Supplementary Figure C** STARD diagram to report flow of participants with a pathogenic BRCA variant on the UK Biobank BiLEVE® SNP chip compared with sequencing.

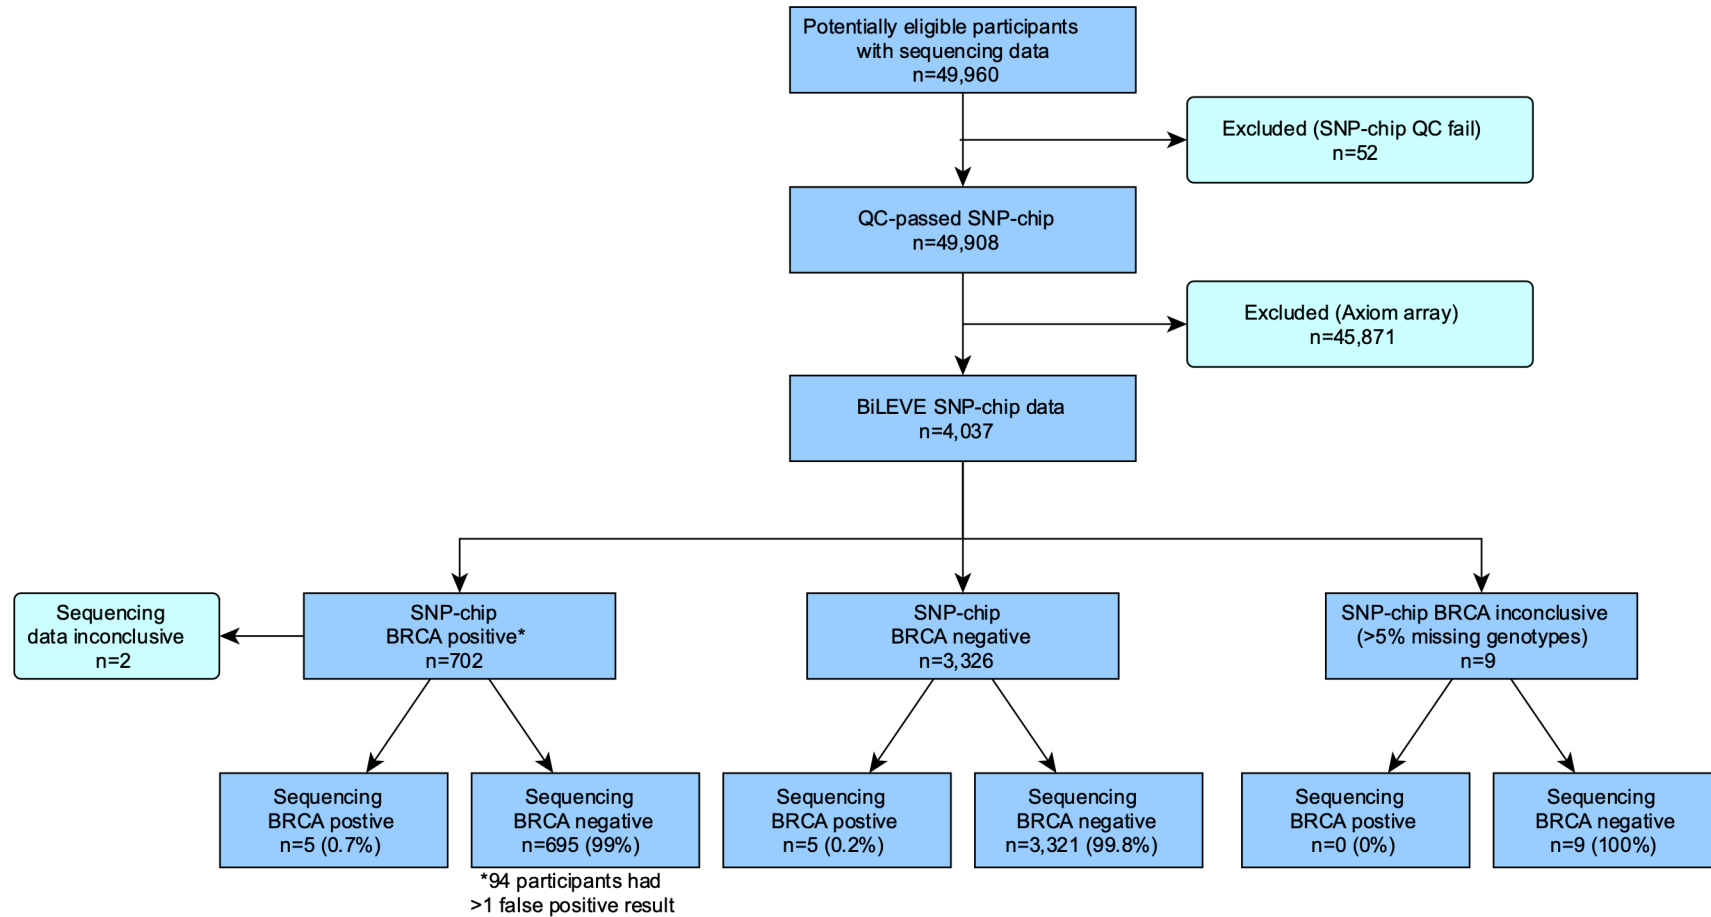

Supplement: weem054760.ww1.pdf [file weem054760.ww1.pdf]
